# Supplementary material
Source: PubMed Central journal article supplement (PMC4371606)
Supplement: NIHMS670711-supplement-Supplemental_Figure_2.pdf [file NIHMS670711-supplement-Supplemental_Figure_2.pdf]

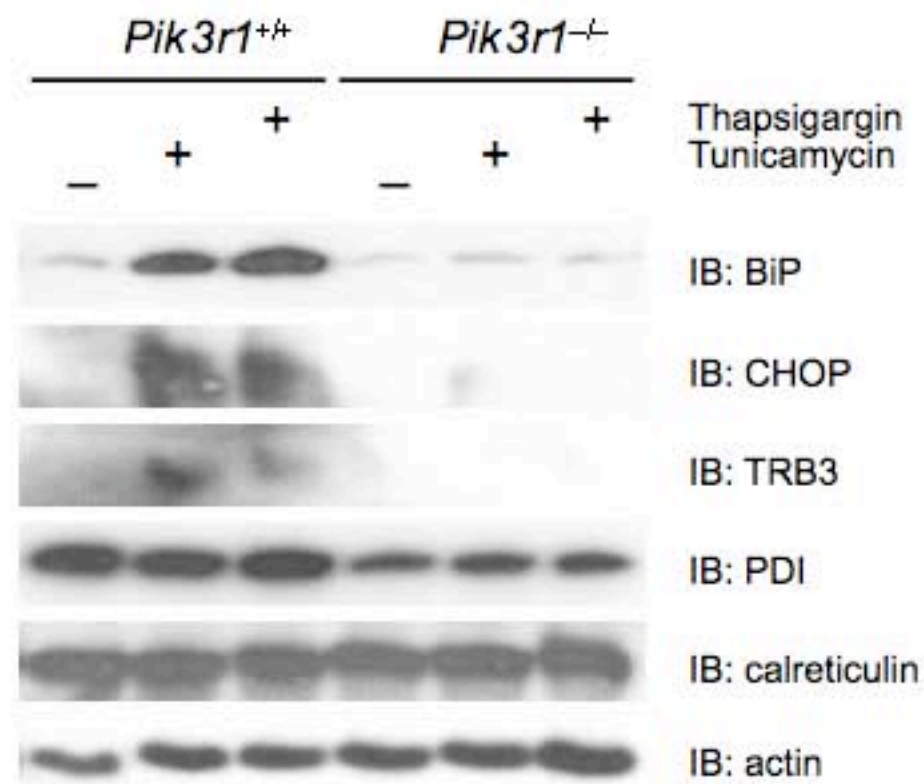

**Supplemental Figure 2: A blunted UPR is observed in p85 $\alpha$ -deficient cells following induction of ER stress.** Control and p85 $\alpha$ -deficient fibroblasts were treated with vehicle (DMSO), 2  $\mu$ g ml<sup>-1</sup> Tunicamycin or 100 nm Thapsigargin for five hours. Whole cell lysates were immunoblotted with the indicated antibodies. Immunoblots performed with anti-actin antibodies confirmed equal protein loading.
