# Supplementary material
Source: PubMed Central journal article supplement (PMC4371606)
Supplement: NIHMS670711-supplement-Supplemental_Figure_3.pdf [file NIHMS670711-supplement-Supplemental_Figure_3.pdf]

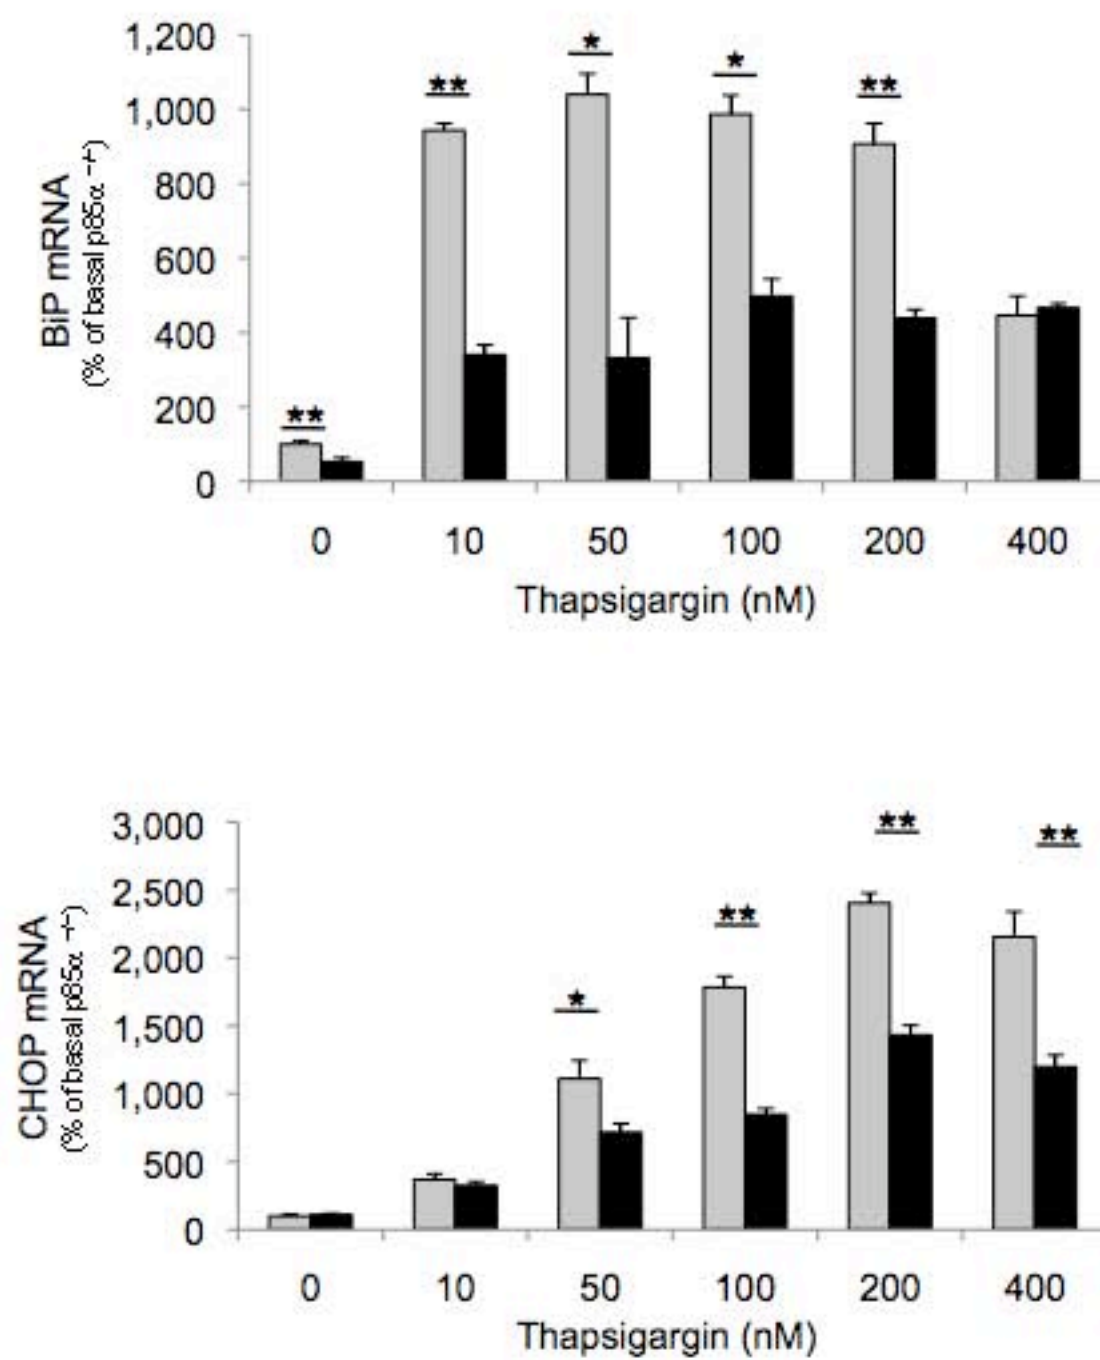

**Supplemental Figure 3: Dose-response of UPR target-gene expression.** Quantitative RT-PCR was performed on cDNA derived from control and  $Pik3r1^{+/-}$  cells treated with the indicated concentrations of thapsigargin for five hours. Data were normalized using TBP as an internal reference.
