# Supplementary material
Source: PubMed Central journal article supplement (PMC4371606)
Supplement: NIHMS670711-supplement-Supplemental_Figure_4.pdf [file NIHMS670711-supplement-Supplemental_Figure_4.pdf]

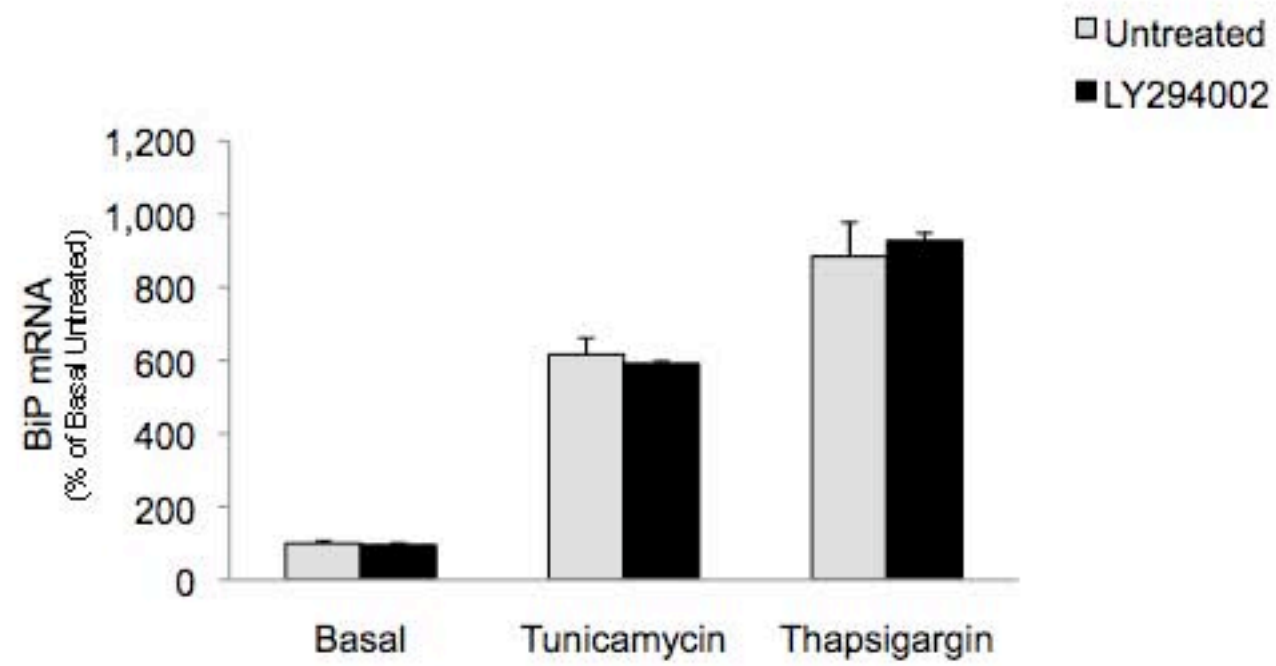

**Supplemental Figure 4: Effect of PI 3-kinase inhibition on UPR target-gene expression.** Quantitative RT-PCR was performed on cDNA derived from control and *Pik3r1*<sup>-/-</sup> cells treated with tunicamycin (2  $\mu\text{g ml}^{-1}$ ) or thapsigargin (100 nM) for five hours in the absence or presence of LY294002 (50  $\mu\text{M}$ ).
