# Supplementary material
Source: PubMed Central journal article supplement (PMC4371606)
Supplement: NIHMS670711-supplement-Supplemental_Figure_5.pdf [file NIHMS670711-supplement-Supplemental_Figure_5.pdf]

a.

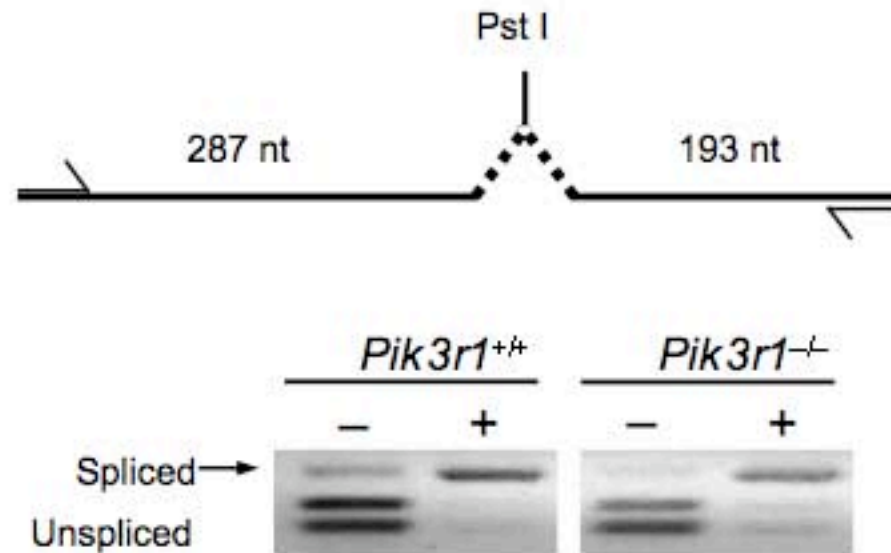

b.

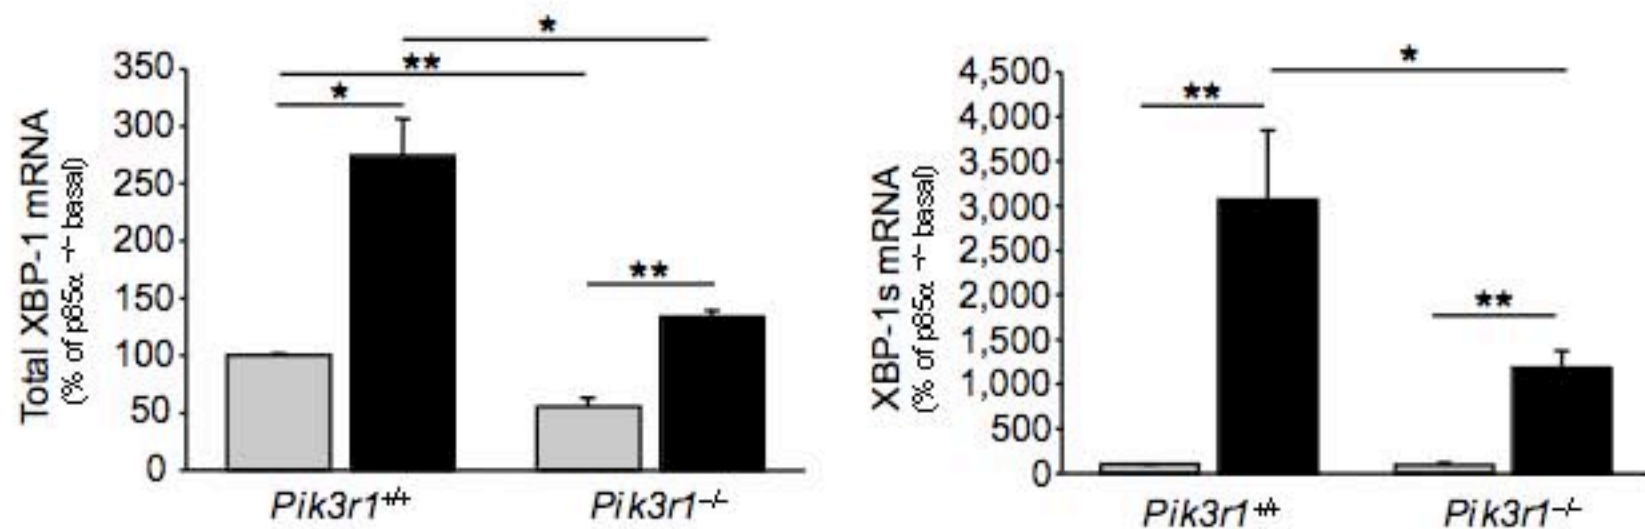

c.

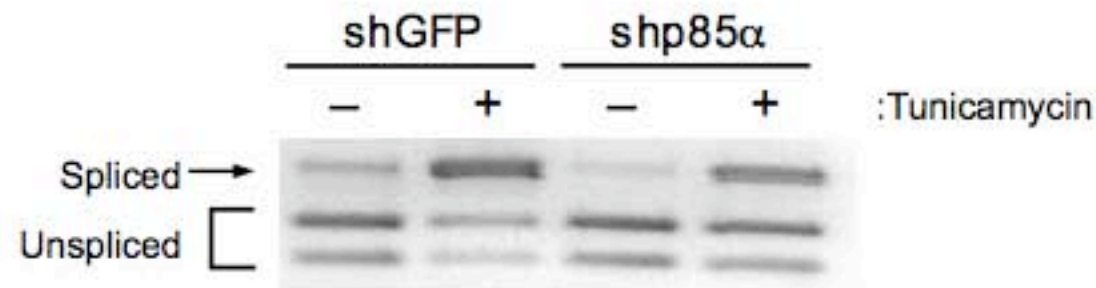

**Supplemental Figure 5: Assessment of XBP-1 splicing in response to ER stress.** a) XBP-1 splicing was evaluated by performing a PCR on cDNA derived from *Pik3r1*<sup>+/+</sup> or *Pik3r1*<sup>-/-</sup> cells treated with vehicle or tunicamycin for five hours. Primers were designed to flank the 26 nt intron excised from the XBP-1s transcript. Resultant PCR products were digested with Pst I restriction endonuclease and resolved by agarose gel electrophoresis. b) Quantitative PCR was performed to examine total XBP-1 and spliced XBP-1 transcript levels in *Pik3r1*<sup>+/+</sup> or *Pik3r1*<sup>-/-</sup> cells treated with vehicle (gray bars) or tunicamycin (black bars) for five hours. Data were normalized using TBP as an internal reference. c) PCR-based assessment of XBP-1 splicing in shGFP and shp85α Huh7 cell lines was performed as previously described. d) Data are presented as the means ± SEM, and asterisks indicate statistical significance determined by student's t-test (\* $p < 0.05$ ; \*\* $p < 0.001$ )
