# Supplementary material
Source: PubMed Central journal article supplement (PMC4371606)
Supplement: NIHMS670711-supplement-Supplemental_Figure_6.pdf [file NIHMS670711-supplement-Supplemental_Figure_6.pdf]

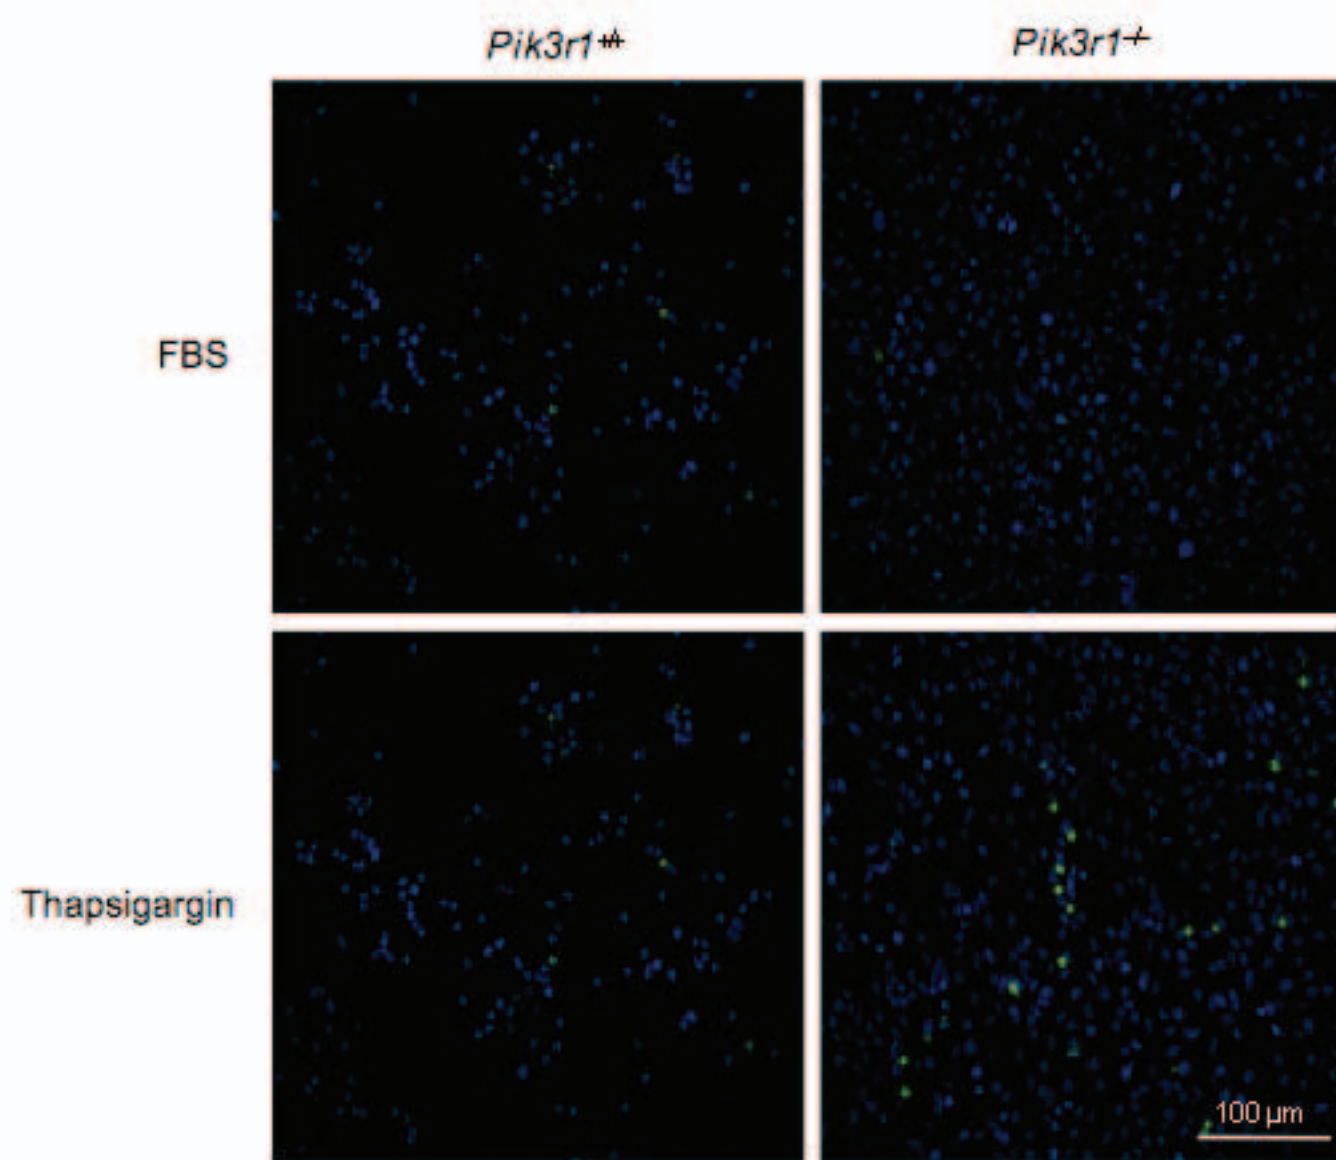

**Supplemental Figure 6: Evaluation of apoptosis in control and p85 $\alpha$ -deficient cells following induction of ER stress.** Control (*Pik3r1<sup>+/+</sup>*) and p85 $\alpha$ -deficient brown pre-adipocytes were cultured in 10% FBS in the absence or presence of thapsigargin (50 nM) for 24 hours. Apoptotic cells were visualized by performing a TUNEL assay. Representative fields for each condition are shown.
