# Supplementary material
Source: PubMed Central journal article supplement (PMC4371606)
Supplement: NIHMS670711-supplement-Supplemental_Figure_7.pdf [file NIHMS670711-supplement-Supplemental_Figure_7.pdf]

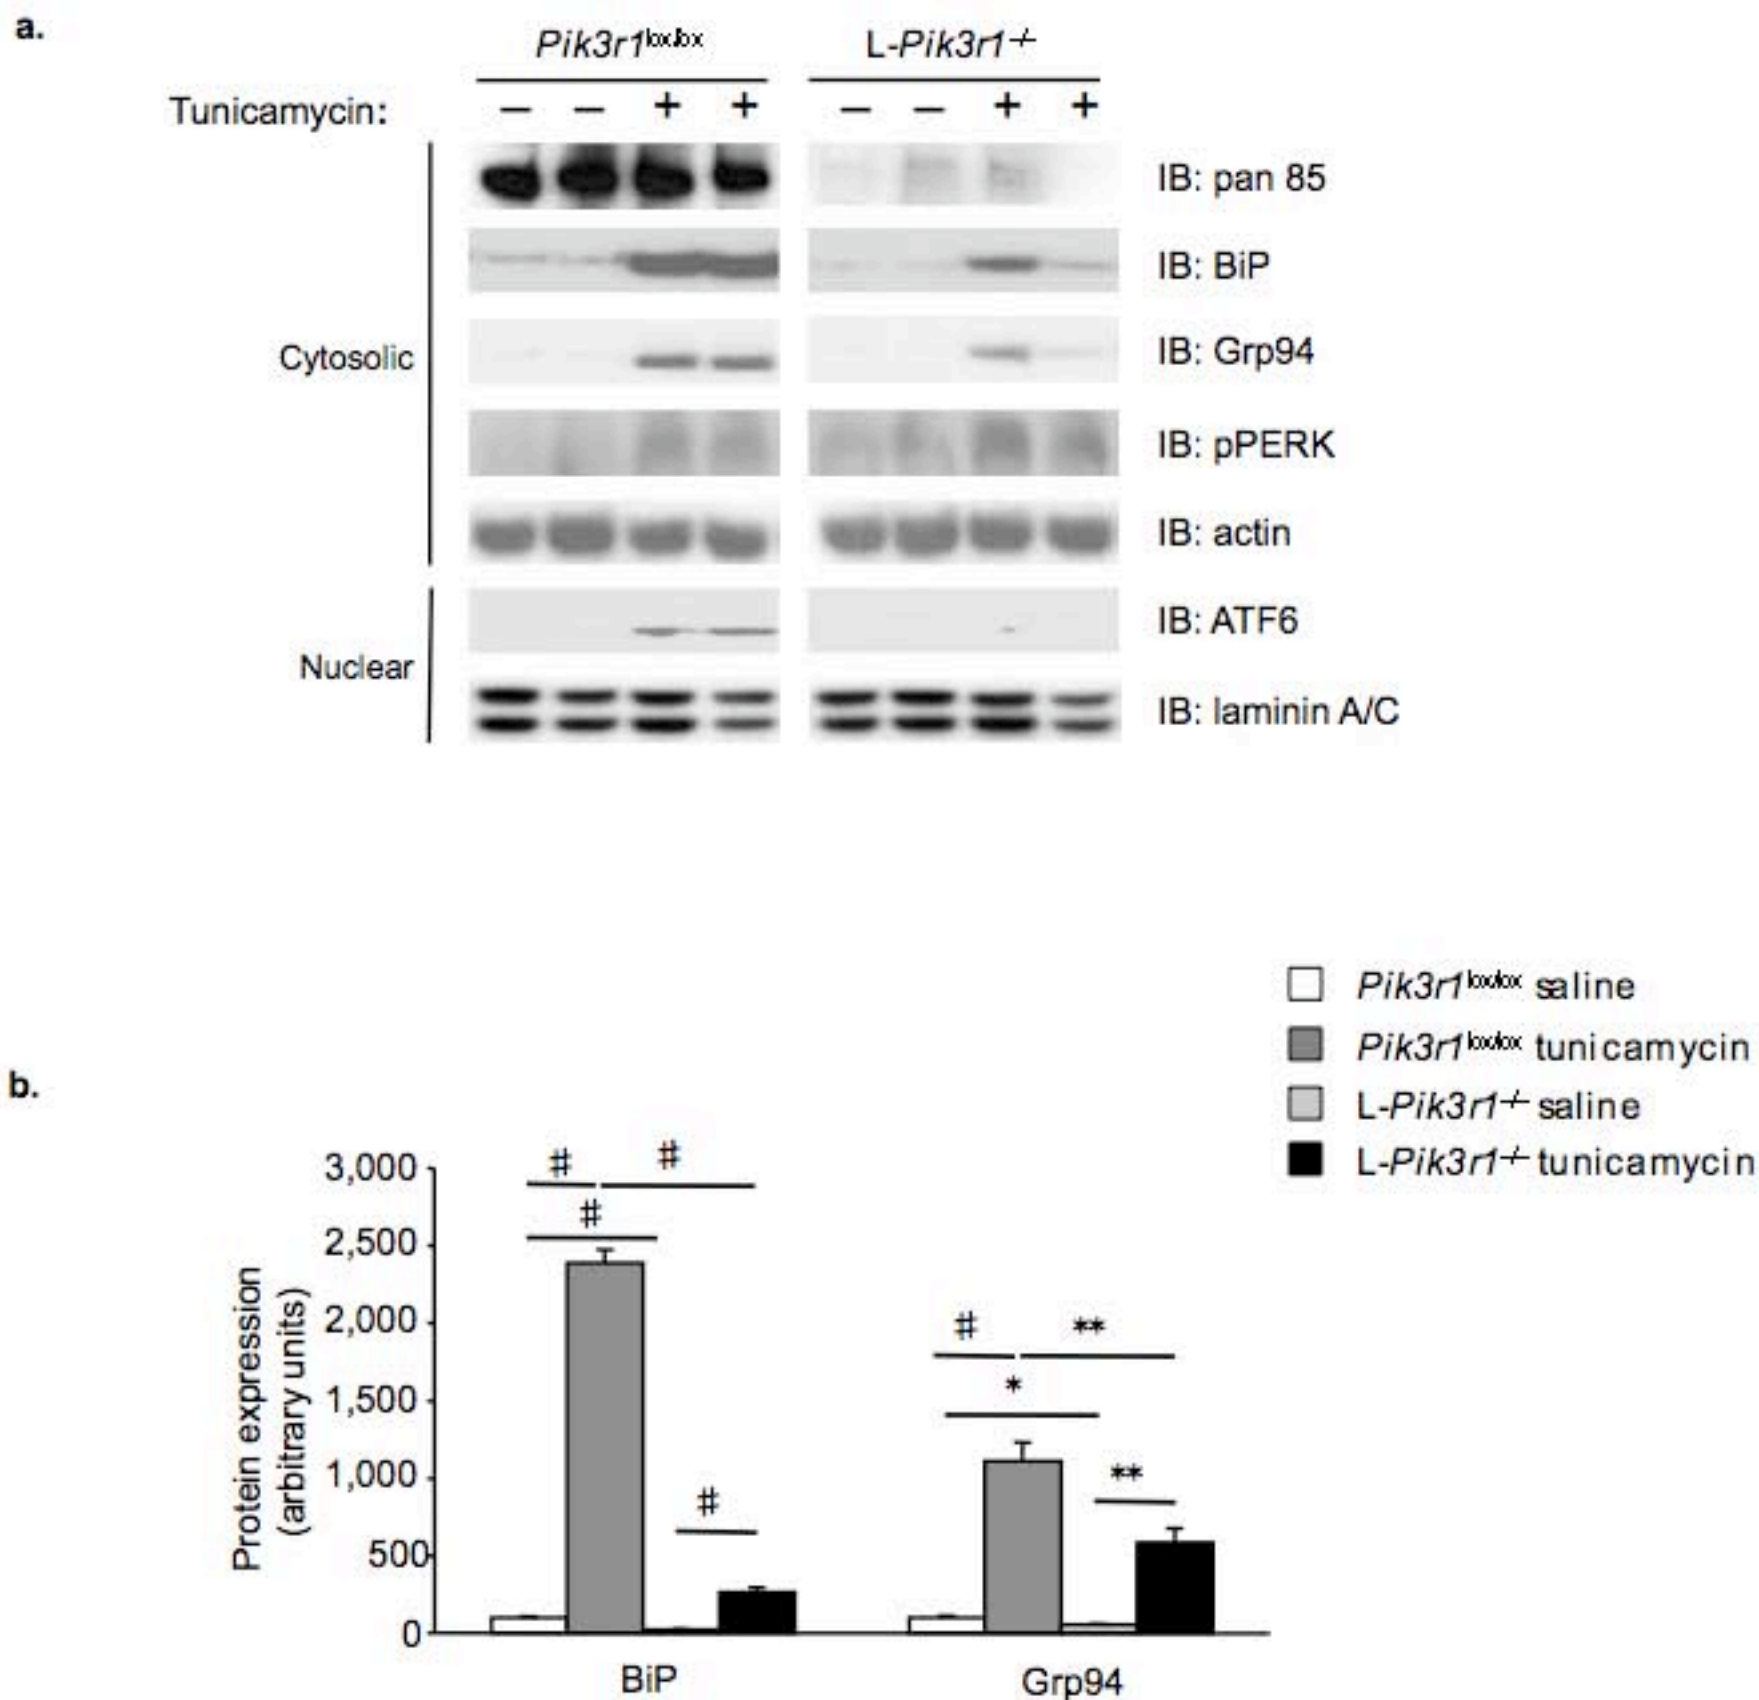

**Supplemental Figure 7: Evaluation of the UPR in livers from control and *L-Pik3r1<sup>+</sup>* mice.** At eight weeks of age, male *Pik3r1<sup>lox/lox</sup>* or *L-Pik3r1<sup>+</sup>* mice were administered vehicle or tunicamycin (2.5  $\mu$ g/g B.W.) by intraperitoneal injection. a) Following treatment for 18 hours ( $n=5$  per group), livers were collected and nuclear as well as cytosolic protein lysates prepared. Following separation by SDS-PAGE and transfer to PVDF, immunoblotting was performed using the indicated antibodies. Actin and laminin A/C immunoblots were performed to confirm equal protein loading. b) Quantification of BiP and Grp94 expression data was achieved by densitometry using NIH Image J software. Data are presented as the means  $\pm$  SEM, and asterisks indicate statistical significance determined by student's t-test (\* $p < 0.05$ ; \*\* $p < 0.001$ )
