# Supplementary material
Source: PubMed Central journal article supplement (PMC4371606)
Supplement: NIHMS670711-supplement-Supplemental_Figure_8.pdf [file NIHMS670711-supplement-Supplemental_Figure_8.pdf]

a.

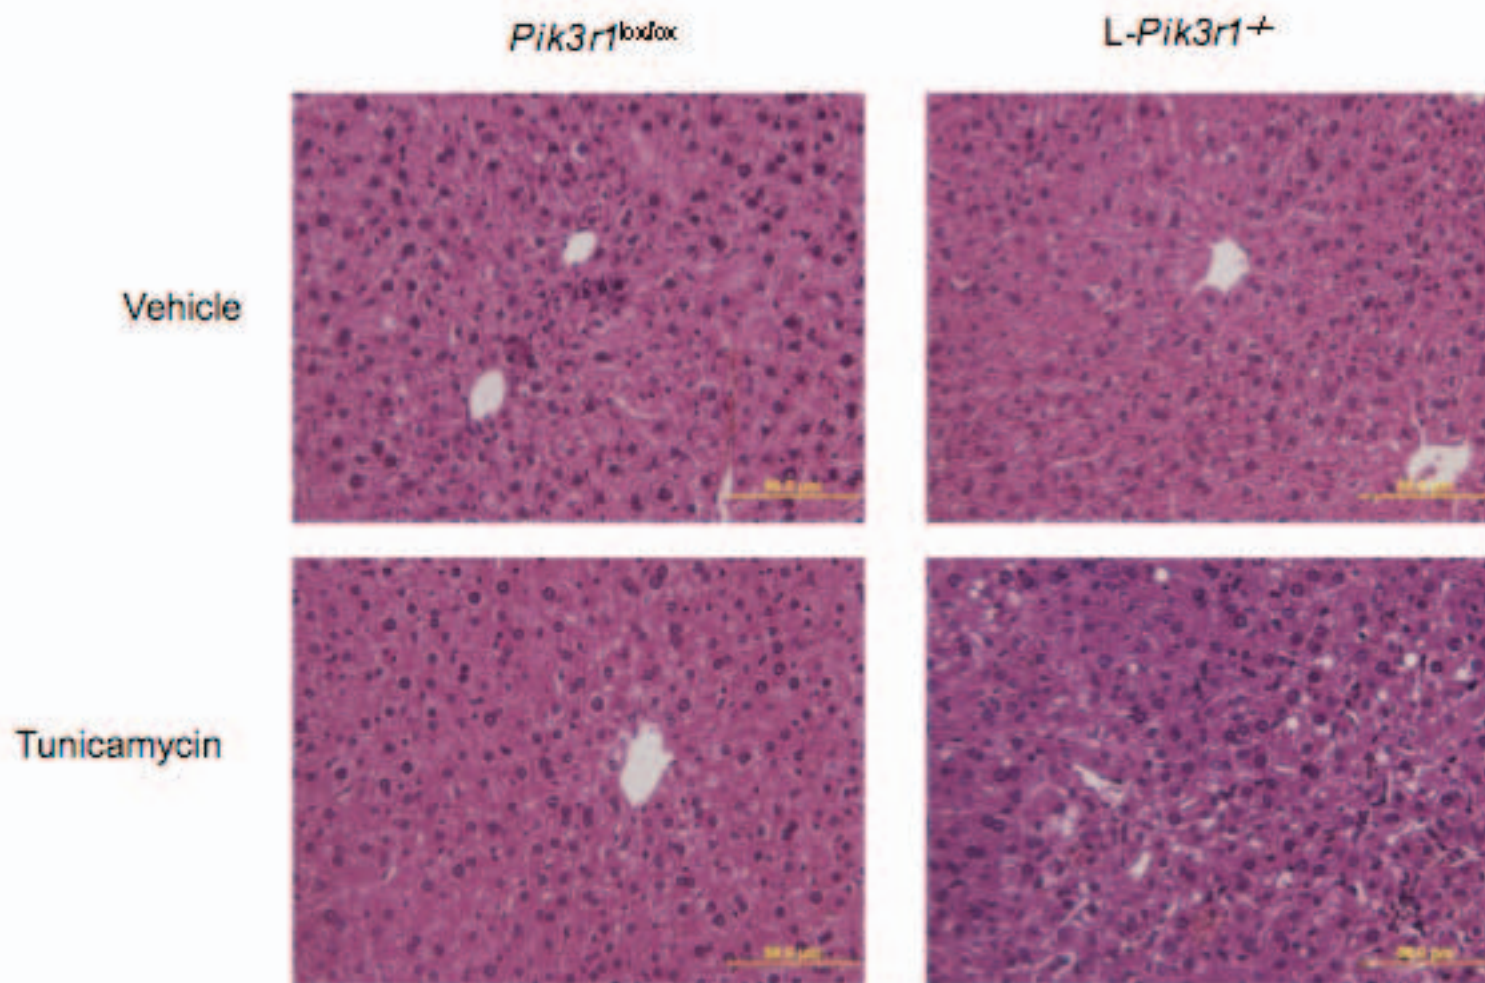

b.

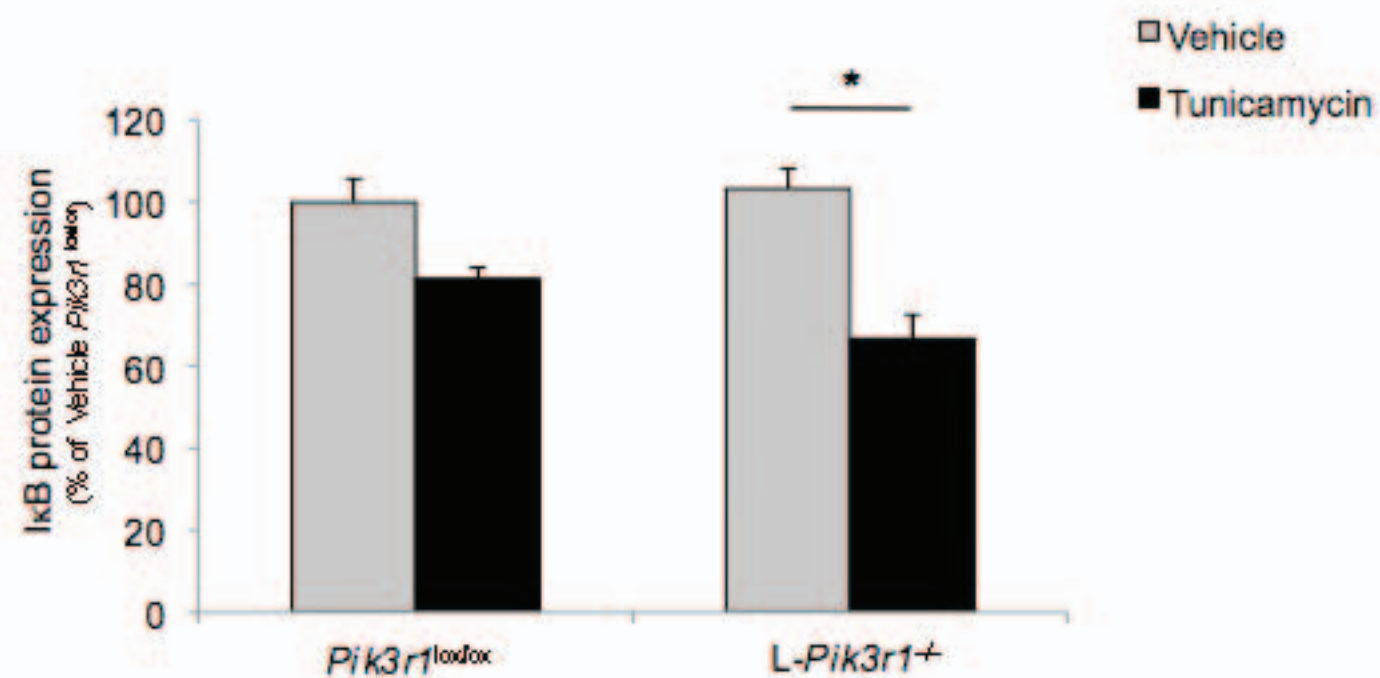

**Supplemental Figure 8: Analysis of livers from control and *L-Pik3r1<sup>+</sup>* mice.** a) Livers from control and *L-Pik3r1<sup>+</sup>* mice treated with vehicle or tunicamycin (2.5 μg/g body weight) were fixed in 4% paraformaldehyde, paraffin embedded and sections stained with Hematoxylin & Eosin. Representative images are shown. (*n*=5 per group) b) IκB protein levels were measured by performing immunoblot analysis on liver lysates from control and *L-Pik3r1<sup>+</sup>* mice treated with vehicle or tunicamycin (2.5 μg/g body weight) for 72 hours.
